# Supplementary material for: Design of a new monitoring network and first testing of new biological assessment methods according to water framework directive
Source: Royal Society of Chemistry journal article supplement (doi:10.1039/b708557p), 2007-01-01
Supplement: b708557p.pdf [file b708557p.pdf]

**Table 1** Biological components processed in the Pilot project Stever in 2005/2006.

| <b>Biological quality components</b> | <b>Sampling method</b>                         | <b>Assessment tool</b>                                                                   |
|--------------------------------------|------------------------------------------------|------------------------------------------------------------------------------------------|
| Macroinvertebrates                   | Multi habitat sampling (PERLODES) <sup>4</sup> | Module Saprobic Index<br>German: Saprobic Index (DIN 38410) <sup>5</sup> , type-specific |
|                                      |                                                | Module General Degradation: Multi-metric index (ASTERICS) <sup>6</sup>                   |
| Macrophytes                          | according to NRW method <sup>7</sup>           | 2 assessment tools applied: PHYLIB <sup>8</sup> and van de Weyer <sup>7</sup>            |
| Fish                                 | FiBS <sup>9,10</sup>                           | FiBS (multi-metric index)                                                                |

**Table 2** Results of the monitoring of the quality components macroinvertebrates and macrophytes within the pilot project Stever (German assessment systems Phylib and Perloides) for all water bodies investigated.

| Macroinvertebrates and macrophytes |                           |                                                         |                                          |                           |
|------------------------------------|---------------------------|---------------------------------------------------------|------------------------------------------|---------------------------|
| Name                               | No. of surface water body | Macroinvertebrates                                      |                                          | Macrophytes               |
|                                    |                           | Quality class Module Saprobic Index                     | Quality class Module General Degradation | Quality class Macrophytes |
| Aabach                             | DE_NRW_278852_0           | good                                                    | good                                     | high                      |
| Boombach                           | DE_NRW_278882_0           | good                                                    | good                                     | <sub>b</sub>              |
| Funne                              | DE_NRW_27886_0            | good                                                    | bad                                      | <sub>b</sub>              |
| Gronenbach                         | DE_NRW_2788512_0          | good                                                    | good                                     | poor                      |
| Hagenbach                          | DE_NRW_278844_0           | good                                                    | poor                                     | high                      |
| Helmerbach                         | DE_NRW_27882_0            | good                                                    | bad                                      | good                      |
| Heubach                            | DE_NRW_27888_0            | good                                                    | moderate                                 | <sub>b</sub>              |
| Heubach                            | DE_NRW_27888_9149         | good                                                    | good                                     | moderate                  |
| Kannebrocksbach                    | DE_NRW_278884_0           | good                                                    | moderate                                 | good                      |
| Kettbach                           | DE_NRW_2788812_0          | good                                                    | moderate <sup>a</sup>                    | moderate                  |
| Kleuterbach                        | DE_NRW_27884_0            | good                                                    | moderate                                 | moderate                  |
| Kleuterbach                        | DE_NRW_27884_5389         | good                                                    | moderate                                 | poor                      |
| Nonnenbach                         | DE_NRW_278834_0           | good                                                    | poor                                     | high                      |
| Passbach                           | DE_NRW_278872_0           | good                                                    | good                                     | <sub>b</sub>              |
| Stever                             | DE_NRW_2788_0             | good                                                    | poor                                     | <sub>b</sub>              |
| Stever                             | DE_NRW_2788_11775         | good                                                    | poor                                     | moderate                  |
| Stever                             | DE_NRW_2788_5294          | good                                                    | poor                                     | bad                       |
| Stever                             | DE_NRW_2788_54378         | good                                                    | moderate                                 | <sub>b</sub>              |
| Teufelsbach                        | DE_NRW_278856_0           | good                                                    | good                                     | poor <sup>c</sup>         |
| Teufelsbach                        | DE_NRW_278856_4692        | good                                                    | poor                                     | <sub>b</sub>              |
| Erkumer Mühlenb.                   | DE_NRW_278876_0           | good <sup>d</sup>                                       | good <sup>d</sup>                        | <sub>b</sub>              |
| Fleisenbach                        | DE_NRW_278842_0           | good <sup>d</sup>                                       | poor <sup>a</sup>                        | <sub>b</sub>              |
| Gorbach                            | DE_NRW_2788562_0          | good <sup>d</sup>                                       | poor <sup>a</sup>                        | <sub>b</sub>              |
| Hagenbach                          | DE_NRW_2788342_0          | good <sup>d</sup>                                       | poor <sup>a</sup>                        | <sub>b</sub>              |
| Hagenbach                          | DE_NRW_2788342_5500       | good <sup>d</sup>                                       | moderate <sup>a</sup>                    | <sub>b</sub>              |
| Nonnenbach                         | DE_NRW_278834_2800        | good <sup>d</sup>                                       | poor <sup>a</sup>                        | <sub>b</sub>              |
| Passbach                           | DE_NRW_278872_8500        | good <sup>d</sup>                                       | poor <sup>a</sup>                        | <sub>b</sub>              |
| Stever                             | DE_NRW_2788_44578         | good <sup>d</sup>                                       | poor <sup>a</sup>                        | poor <sup>c</sup>         |
| Teufelsbach                        | DE_NRW_278856_8847        | good <sup>d</sup>                                       | moderate <sup>a</sup>                    | <sub>b</sub>              |
| Dümmer                             | DE_NRW_278832_0           | moderate                                                | poor <sup>a</sup>                        | <sub>b</sub>              |
| Dümmer                             | DE_NRW_278832_2500        | moderate                                                | poor                                     | poor                      |
| Funne                              | DE_NRW_27886_3388         | moderate                                                | poor                                     | <sub>b</sub>              |
| Gronenbach                         | DE_NRW_2788512_4391       | moderate                                                | poor <sup>a</sup>                        | <sub>b</sub>              |
| Hagenbach                          | DE_NRW_278844_6610        | moderate                                                | moderate <sup>a</sup>                    | high                      |
| Helmerbach                         | DE_NRW_27882_8000         | moderate                                                | bad                                      | <sub>b</sub>              |
| Kiffertbach                        | DE_NRW_278886_0           | moderate                                                | good                                     | high                      |
| Kleuterbach                        | DE_NRW_27884_18409        | moderate                                                | poor                                     | <sub>b</sub>              |
| Nonnenbach                         | DE_NRW_278834_11600       | moderate                                                | moderate                                 | <sub>b</sub>              |
| Nonnenbach                         | DE_NRW_278834_15700       | moderate                                                | moderate                                 | high                      |
| Stever                             | DE_NRW_2788_34078         | moderate                                                | bad                                      | good                      |
| Stever                             | DE_NRW_2788_39378         | moderate                                                | poor                                     | good                      |
| Aabach                             | DE_NRW_278852_6392        | moderate <sup>a</sup>                                   | poor <sup>a</sup>                        | <sub>b</sub>              |
| Beverbach                          | DE_NRW_278854_0           | moderate <sup>a</sup>                                   | good <sup>d</sup>                        | <sub>b</sub>              |
| Beverbach                          | DE_NRW_278854_5488        | moderate <sup>a</sup>                                   | poor <sup>a</sup>                        | <sub>b</sub>              |
| Bünebach                           | DE_NRW_2788842_0          | moderate <sup>a</sup>                                   | moderate <sup>a</sup>                    | poor                      |
| Bünebach                           | DE_NRW_2788842_10300      | moderate <sup>a</sup>                                   | poor <sup>a</sup>                        | <sub>b</sub>              |
| Erkumer Muehlenb.                  | DE_NRW_278876_1701        | moderate <sup>a</sup>                                   | poor <sup>a</sup>                        | <sub>b</sub>              |
| Fleisenbach                        | DE_NRW_278842_3720        | moderate <sup>a</sup>                                   | poor <sup>a</sup>                        | <sub>b</sub>              |
| Kiffertbach                        | DE_NRW_278886_6600        | moderate <sup>a</sup>                                   | poor <sup>a</sup>                        | <sub>b</sub>              |
| Boombach                           | DE_NRW_278882_4000        | bad                                                     | bad                                      | poor                      |
| Stever                             | DE_NRW_2788_2317          | <i>no investigation for rivers possible (reservoir)</i> |                                          |                           |
| Stever                             | DE_NRW_2788_7252          | <i>no investigation (dried up)</i>                      |                                          |                           |
| Aabach                             | DE_NRW_278852_3992        |                                                         |                                          |                           |
| Funne                              | DE_NRW_27886_18488        | <i>no investigation (dried up)</i>                      |                                          |                           |

<sup>a</sup> result was transferred from a neighbouring waterbody with comparable characteristics

<sup>b</sup> not investigated / not assessable

<sup>c</sup> more than one result of investigation per waterbody ("worst case")
